# Supplementary material
Source: ML conference proceedings conference paper supplement (https://openaccess.thecvf.com/content/cvpr_2016/html/Hayder_Learning_to_Co-Generate_2016_CVPR_paper.html)
Supplement: Supplementary file 1 [file Hayder_Learning_to_Co-Generate_2016_CVPR_supplemental.pdf]

# Learning to Co-Generate Object Proposals with a Deep Structured Network

## Supplementary Material

Zeeshan Hayder<sup>1,2</sup>, Xuming He<sup>2,1</sup>

<sup>1</sup>Australian National University & <sup>2</sup>NICTA \*  
 {zeeshan.hayder, xuming.he}@anu.edu.au

Mathieu Salzmann<sup>1,3</sup>

<sup>3</sup>CVLab, EPFL, Switzerland  
 mathieu.salzmann@epfl.ch

### 1. Deep Co-Objectness and Detection

To demonstrate the impact of having better object proposals on object detection, we employed our proposals within the Fast RCNN algorithm of [1]. In Table 1, we compare the resulting Average Precisions with the of state-of-the-art object detectors on Pascal VOC 2007. We used selective search proposals by Hosang et al. [4] as initial pool of bounding-boxes to co-generate the object proposals. Following [3], we also provide a detailed comparison of different performance criteria in Fig. 1. Note that we outperform the original Fast RCNN by 4.2% on average, with up to 12% for some classes, such as *bottle*. Note also that we outperform the state-of-the-art object co-detection approach of [2] and the region proposal network of [5]. The detection trends for all the object categories are detailed in Fig. 2.

| VOC 2007 (test)         | aero | bike | bird | boat | bottle | bus  | car  | cat  | chair | cow  | table | dog  | horse | mbike | person | plant | sheep | sofa | train | tv   | mAP  |
|-------------------------|------|------|------|------|--------|------|------|------|-------|------|-------|------|-------|-------|--------|-------|-------|------|-------|------|------|
| Fast RCNN (SS) [1]      | 74.5 | 78.3 | 69.2 | 53.2 | 36.6   | 77.3 | 78.2 | 82.0 | 40.7  | 72.7 | 67.9  | 79.6 | 79.2  | 73.0  | 69.0   | 30.1  | 65.4  | 70.2 | 75.8  | 65.8 | 66.9 |
| CoDet-G-DL (SS) [2]     | 75.8 | 78.1 | 69.3 | 53.8 | 36.9   | 77.5 | 79.0 | 82.5 | 40.1  | 73.5 | 67.7  | 81.4 | 82.2  | 75.4  | 70.0   | 33.4  | 65.4  | 70.0 | 74.3  | 67.2 | 67.7 |
| RPN [5]                 | 70.0 | 80.6 | 70.1 | 57.3 | 49.9   | 78.2 | 80.4 | 82.0 | 52.2  | 75.3 | 67.2  | 80.3 | 79.8  | 75.0  | 76.3   | 39.1  | 68.3  | 67.3 | 81.1  | 67.6 | 69.9 |
| Co-Obj (SS) + Fast RCNN | 73.4 | 79.4 | 71.9 | 61.6 | 48.4   | 81.2 | 81.9 | 84.8 | 47.5  | 78.2 | 69.6  | 81.5 | 81.9  | 77.8  | 75.5   | 38.1  | 73.4  | 68.9 | 78.0  | 68.0 | 71.1 |

Table 1: **Detection Average Precision(%) on the PASCAL VOC 2007 test set:** Rows 1-3 show the multi-class object detection state-of-the-art results. The results of our approach are provided in Row 4.

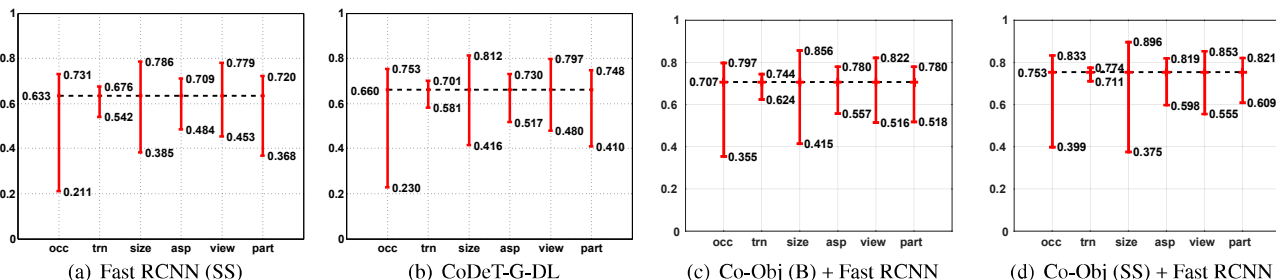

Figure 1: **Sensitivity and impact analysis:** Overall detailed performance comparison using different metrics (i.e., occlusion, truncated, size, aspect ratio, view point and part visibility). The black dashed line indicates the overall average normalized precision  $AP_N$ .

### References

- [1] R. B. Girshick. Fast R-CNN. In *IEEE International Conference on Computer Vision (ICCV)*, 2015.
- [2] Z. Hayder, X. He, and M. Salzmann. Structural kernel learning for large scale multiclass object co-detection. In *IEEE International Conference on Computer Vision (ICCV)*, 2015.
- [3] D. Hoiem, Y. Chodpathumwan, and Q. Dai. Diagnosing error in object detectors. In *The European Conference on Computer Vision (ECCV)*, pages 340–353. Springer, 2012.

\*NICTA is funded by the Australian Government as represented by the Department of Broadband, Communications and the Digital Economy and the ARC through the ICT Centre of Excellence program.

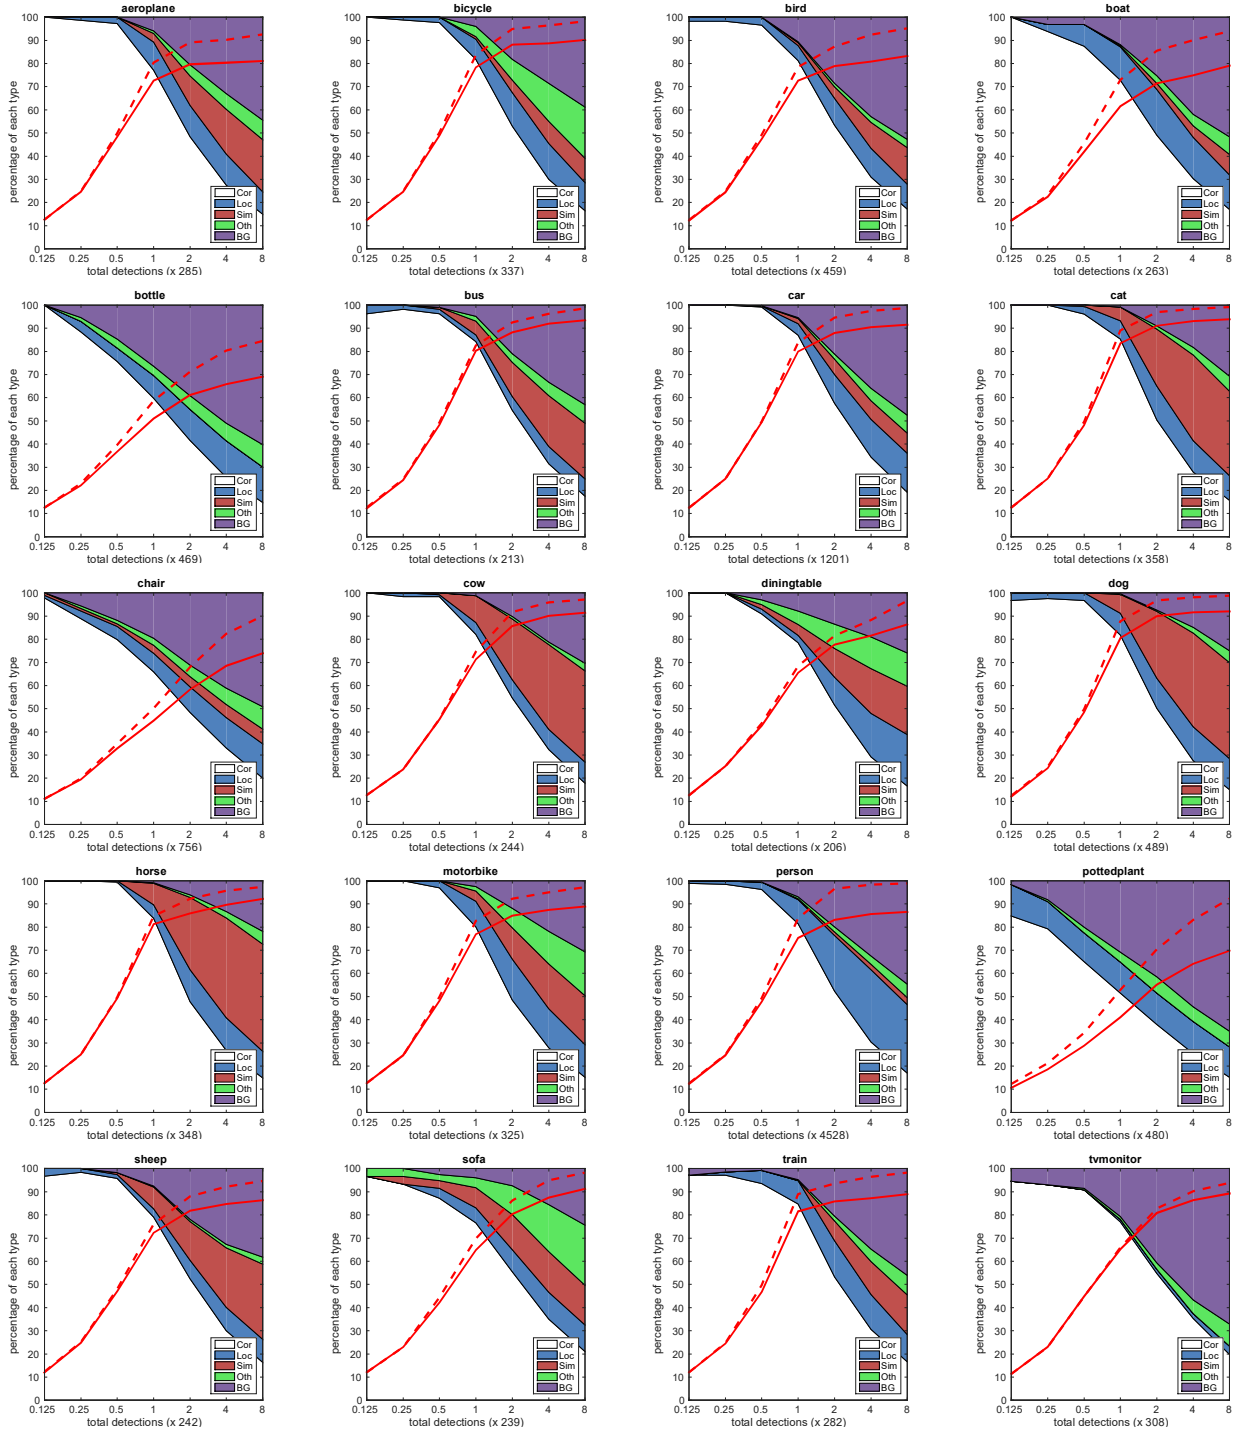

Figure 2: **Deep co-objectness and detection trends.** Following [3], we show the evolution of the type of detection as the number of detections increases; The white areas correspond to the correct detections; The blue areas represent the detections with localization error; The red areas correspond to confusion with a similar category; The green areas represent the confusion with a dissimilar category. Finally, the curves show the recall as a function of the number of objects (dashed=weak localization, solid=strong localization).

- [4] J. H. Hosang, R. Benenson, P. Dollár, and B. Schiele. What makes for effective detection proposals? *IEEE Transactions on Pattern Analysis and Machine Intelligence (TPAMI)*, 2015.
- [5] S. Ren, K. He, R. Girshick, and J. Sun. Faster R-CNN: Towards real-time object detection with region proposal networks. In *The Conference on Neural Information Processing Systems (NIPS)*, 2015.
